# Supplementary material
Source: PubMed Central journal article supplement (PMC3417835)
Supplement: supp_jn.112.160333_nut160333-STable1-STable4_SFig1-SFig3.pdf [file supp_jn.112.160333_nut160333-STable1-STable4_SFig1-SFig3.pdf]

## Online Supporting Material

### Model Selection

#### Screening of the SNPs

Two methods were used to screen the single nucleotide polymorphisms (SNP). The first method used was the stepwise backward selection based on Akaike Information Criterion (AIC) and the second method was the Least Angle Regression (LASSO). To use AIC variable selection, we first fitted a preliminary model with only main effects, including blood sample type (whole blood, WB, versus plasma-deplete cells, PDC) used for folate analysis, age, gender, BMI, and 64 SNP, with no interaction terms. Group, gender, and 14 SNPs were selected by AIC stepwise selection and formed the preliminary model 1 (**Supplemental Table S1**). The *P* values were based on two-sided *t*-tests and we also computed *P* values adjusted by the false discovery rate (1, 2).

**Supplemental Table 1:** Results from the first screening of predictors for main effects using the AIC criterion

| Predictor     | SNP        | Estimate | Standard Error | <i>t</i> value | <i>P</i> value | Adjusted <i>P</i> value <sup>1</sup> |
|---------------|------------|----------|----------------|----------------|----------------|--------------------------------------|
| Intercept     | -          | -5.298   | 0.136          | -38.906        | 0.000          | 0.000                                |
| <i>SPTLC1</i> | rs11790991 | -0.066   | 0.037          | -1.764         | 0.079          | 0.115                                |
| <i>BCMO1</i>  | rs12934922 | -0.051   | 0.032          | -1.607         | 0.109          | 0.115                                |
| <i>CD36</i>   | rs1358337  | 0.051    | 0.032          | 1.616          | 0.107          | 0.115                                |
| <i>MTHFR</i>  | rs1801131  | 0.052    | 0.034          | 1.514          | 0.131          | 0.131                                |
| <i>CRBP2</i>  | rs2118981  | -0.104   | 0.032          | -3.236         | 0.001          | 0.006                                |
| <i>ABCA1</i>  | rs2230806  | 0.070    | 0.034          | 2.075          | 0.039          | 0.087                                |
| <i>APOA1</i>  | rs2727784  | -0.052   | 0.032          | -1.661         | 0.098          | 0.115                                |
| <i>BCMO2</i>  | rs35361223 | 0.150    | 0.075          | 1.994          | 0.047          | 0.094                                |
| <i>BHMT</i>   | rs3733890  | 0.077    | 0.035          | 2.171          | 0.031          | 0.079                                |
| $\alpha$ -TTP | rs4501570  | 0.683    | 0.299          | 2.288          | 0.023          | 0.068                                |
| $\alpha$ -TTP | rs4587328  | -0.689   | 0.299          | -2.307         | 0.022          | 0.068                                |
| <i>CETP</i>   | rs5882     | 0.060    | 0.033          | 1.793          | 0.074          | 0.115                                |
| <i>FOLH1</i>  | rs61886492 | -0.167   | 0.086          | -1.939         | 0.053          | 0.096                                |
| <i>SCARB1</i> | rs838892   | 0.054    | 0.032          | 1.691          | 0.092          | 0.115                                |

<sup>1</sup>*P*-values are adjusted by the false discovery rate (1, 2).

## Online Supporting Material

For the LASSO variable selection, we only included 64 SNPs as predictors. We used the **Lars** program in R to implement the variable selection (3, 4). The response is log(nHcy), the predictors are 64 SNP, which need to be normalized to mean zero and variance 1. A tuning parameter lambda controls the fraction of non-zero coefficients (number of SNP in the model). The solution path is shown in **Supplemental Table 2**, which indicates the order in which the SNP entered the model when decreasing the tuning parameter lambda. The SNP that enter the model in earlier steps tend to be more important and significant.

**Supplemental Table 2:** The LASSO path.

| Step | Action | Predictor                      | SNP        | lambda |
|------|--------|--------------------------------|------------|--------|
| 1    | +      | <i>CRBP2</i>                   | rs3772875  | 0.928  |
| 2    | +      | <i>SPTLC1</i>                  | rs11790991 | 0.919  |
| 3    | +      | <i>CETP</i>                    | rs5882     | 0.761  |
| 4    | +      | <i>FOLH1</i>                   | rs61886492 | 0.688  |
| 5    | +      | <i>BHMT</i>                    | rs3733890  | 0.684  |
| 6    | +      | <i>BCMO1</i>                   | rs12934922 | 0.662  |
| 7    | +      | <i>RBP2</i>                    | rs2118981  | 0.624  |
| 8    | +      | <i>CD36</i>                    | rs3211931  | 0.613  |
| 9    | +      | <i>SCARB1</i>                  | rs838892   | 0.602  |
| 10   | +      | <i>SLC46A1</i>                 | rs17719944 | 0.595  |
| 11   | +      | <i>CYP4F2</i>                  | rs2108622  | 0.571  |
| 12   | +      | <i>MTHFR</i>                   | rs1801131  | 0.552  |
| 13   | +      | <i>ABCA1</i>                   | rs2230806  | 0.547  |
| 14   | +      | <i>APOA1</i>                   | rs2727784  | 0.524  |
| 15   | +      | <i>BCMO1</i>                   | rs7501331  | 0.468  |
| 16   | +      | <i>SLC46A1</i>                 | rs11080058 | 0.463  |
| 17   | +      | <i>SCARB1</i>                  | rs7306660  | 0.450  |
| 18   | +      | <i><math>\alpha</math>-TTP</i> | rs4606052  | 0.450  |
| 19   | +      | <i>SCARB1</i>                  | rs10773105 | 0.439  |
| 20   | +      | <i>BMCO2</i>                   | rs35361223 | 0.399  |
| 21   | +      | <i>MTR</i>                     | rs1805087  | 0.368  |
| 22   | +      | <i>SCARB1</i>                  | rs7967521  | 0.340  |
| 23   | +      | <i>MTTP</i>                    | rs3828542  | 0.334  |
| 24   | +      | <i>CETP</i>                    | rs7205804  | 0.291  |
| 25   | +      | <i>TCII</i>                    | rs1801198  | 0.279  |
| 26   | +      | <i>RBP2</i>                    | rs35674260 | 0.277  |

## Online Supporting Material

|    |   |                                |             |       |
|----|---|--------------------------------|-------------|-------|
| 27 | + | <i>NPC1L1</i>                  | rs217420    | 0.262 |
| 28 | + | <i>CETP</i>                    | rs5880      | 0.252 |
| 29 | + | <i>MTRR</i>                    | rs1801394   | 0.247 |
| 30 | + | <i>SLC19A1</i>                 | Rs111702537 | 0.219 |
| 31 | + | <i>MTHFR</i>                   | rs1801133   | 0.200 |
| 32 | + | <i>BCMO2</i>                   | rs2250417   | 0.187 |
| 33 | + | <i>CYP4F2</i>                  | rs3093194   | 0.177 |
| 34 | + | <i>ABCA1</i>                   | rs4149327   | 0.176 |
| 35 | + | <i>SLC46A1</i>                 | rs1128162   | 0.171 |
| 36 | + | <i>APOA5</i>                   | rs12272004  | 0.167 |
| 37 | + | <i>SPTLC1</i>                  | rs7858659   | 0.156 |
| 38 | + | <i>SLC46A1</i>                 | rs739439    | 0.151 |
| 39 | + | <i>NPC1L1</i>                  | rs217430    | 0.140 |
| 40 | + | <i>SLC19A1</i>                 | rs13050920  | 0.136 |
| 41 | + | <i>BCMO1</i>                   | rs6564851   | 0.133 |
| 42 | + | <i>NPC1L1</i>                  | rs217432    | 0.108 |
| 43 | + | <i>ABCA1</i>                   | rs2230808   | 0.103 |
| 44 | + | <i>CETP</i>                    | rs7499892   | 0.102 |
| 45 | + | <i>CD36</i>                    | rs3211956   | 0.092 |
| 46 | + | <i>SCARB1</i>                  | rs12582221  | 0.077 |
| 47 | + | <i>MTTP</i>                    | rs1057613   | 0.074 |
| 48 | + | <i><math>\alpha</math>-TTP</i> | rs4501570   | 0.070 |
| 49 | + | <i>BCMO2</i>                   | rs11214139  | 0.068 |
| 50 | + | <i>CYP4F2</i>                  | rs3093168   | 0.061 |
| 51 | + | <i>CBS</i>                     | rs5742905   | 0.061 |
| 52 | + | <i>NPC1L1</i>                  | rs11763759  | 0.061 |
| 53 | + | <i>SLC19A1</i>                 | rs3788199   | 0.058 |
| 54 | + | <i>ABCA1</i>                   | rs4149267   | 0.058 |
| 55 | + | <i>CD36</i>                    | rs3211834   | 0.056 |
| 56 | - | <i>CYP4F2</i>                  | rs3093194   | 0.045 |
| 57 | + | <i>APOA5</i>                   | rs3135506   | 0.045 |
| 58 | + | <i>SLC46A1</i>                 | rs35714695  | 0.045 |
| 59 | + | <i>SLC19A1</i>                 | rs3788205   | 0.043 |
| 60 | + | <i>CD36</i>                    | rs1358337   | 0.041 |
| 61 | + | <i><math>\alpha</math>-TTP</i> | rs4587328   | 0.040 |
| 62 | + | <i>SPTLC1</i>                  | rs2297568   | 0.036 |
| 63 | + | <i>APOA5</i>                   | rs662799    | 0.017 |
| 64 | + | <i>MTTP</i>                    | rs10516445  | 0.009 |
| 65 | + | <i>CYP4F2</i>                  | rs3093194   | 0.008 |
| 66 | + | <i>MTTP</i>                    | rs881890    | 0.006 |

## Online Supporting Material

The sum of residual squares plot for the LASSO method (**Supplemental Figure 1**) indicates that there is a drop in the sum of residual squares at step 15. Therefore, we decided to include the first 15 SNP with corresponding lambda of 0.468 (**Supplemental Table 2**).

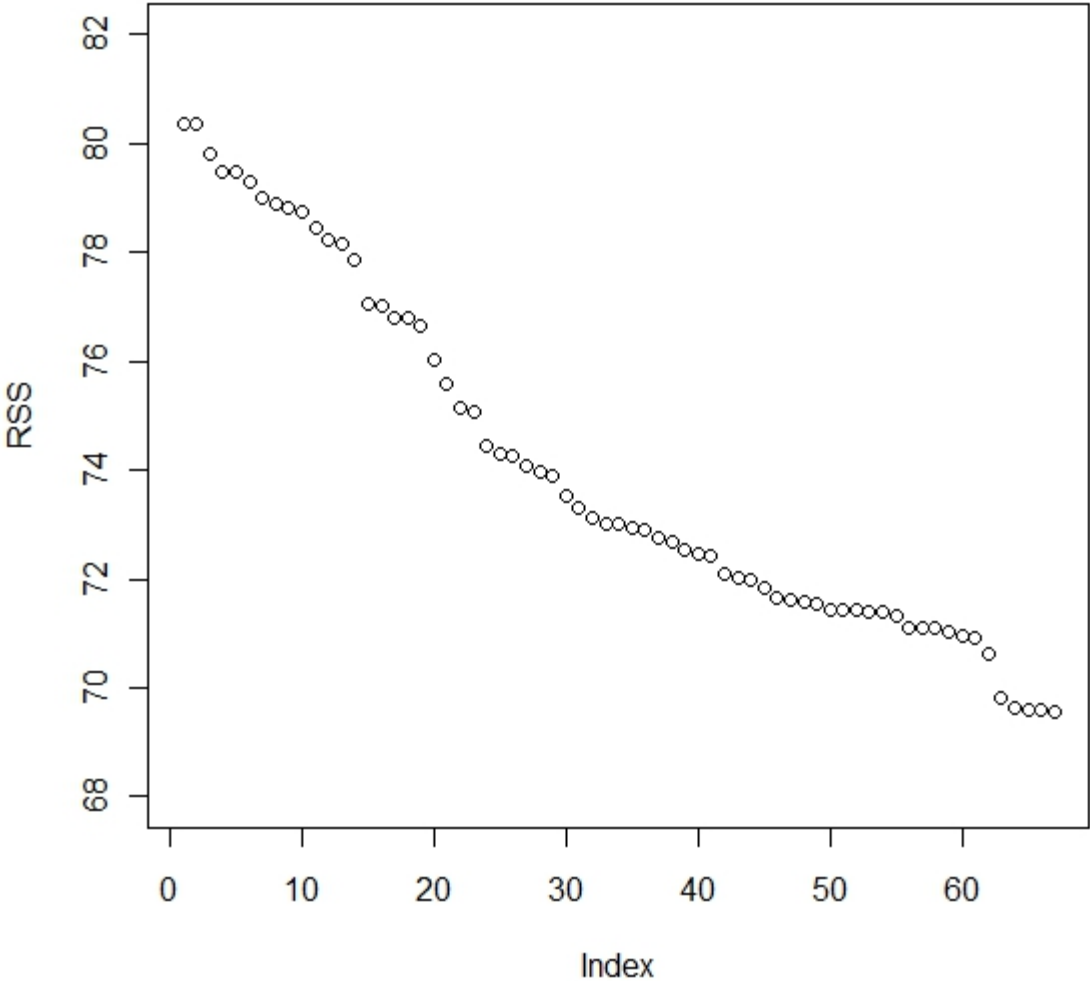

Supplemental Figure 1: The sum of residual squares plot for the LASSO method

## Online Supporting Material

### *Adding interactions and fitting the final model*

To check for interactions between gender and SNP, we first started with the preliminary model 1 (**Supplemental Table 1**) that was obtained by AIC variable selection. All fourteen predictors in the preliminary model and all interaction terms between gender and fourteen SNP were included before using AIC stepwise selection again. The summary of the results are in **Supplemental Table 3**.

**Supplemental Table 3:** The summary of the model obtained by adding interactions between gender and 14 SNP to the model screened by AIC.

| Predictor                | SNP        | Estimate | Standard Error | t value | P value | Adjusted P value <sup>1</sup> |
|--------------------------|------------|----------|----------------|---------|---------|-------------------------------|
| Intercept                | -          | -4.986   | 0.092          | -54.144 | 0.000   | 0.000                         |
| Blood groups, WB vs. PDC | -          | -0.270   | 0.054          | -5.015  | 0.000   | 0.000                         |
| <i>SPTLC1</i>            | rs11790991 | -0.075   | 0.036          | -2.090  | 0.037   | 0.069                         |
| <i>BCMO1</i>             | rs12934922 | -0.051   | 0.031          | -1.619  | 0.106   | 0.123                         |
| <i>MTHFR</i>             | rs1801131  | -0.033   | 0.044          | -0.759  | 0.448   | 0.469                         |
| <i>CRBP2</i>             | rs2118981  | -0.181   | 0.043          | -4.247  | 0.000   | 0.000                         |
| <i>ABCA1</i>             | rs2230806  | 0.065    | 0.033          | 1.973   | 0.049   | 0.083                         |
| <i>APOA1</i>             | rs2727784  | -0.099   | 0.042          | -2.342  | 0.020   | 0.043                         |
| <i>BCMO2</i>             | rs35361223 | 0.119    | 0.073          | 1.623   | 0.106   | 0.123                         |
| <i>BHMT</i>              | rs3733890  | 0.083    | 0.035          | 2.386   | 0.018   | 0.043                         |
| $\alpha$ -TTP            | rs4501570  | 0.602    | 0.289          | 2.086   | 0.038   | 0.069                         |
| $\alpha$ -TTP            | rs4587328  | -0.543   | 0.289          | -1.881  | 0.061   | 0.085                         |
| <i>CETP</i>              | rs5882     | 0.111    | 0.043          | 2.575   | 0.010   | 0.038                         |
| <i>FOLH1</i>             | rs61886492 | -0.145   | 0.084          | -1.733  | 0.084   | 0.109                         |
| <i>SCARB1</i>            | rs838892   | 0.000    | 0.044          | 0.003   | 0.998   | 0.998                         |
| Gender                   | -          | -0.542   | 0.122          | -4.453  | 0.000   | 0.000                         |
| Gender x <i>MTHFR</i>    | rs1801131  | 0.162    | 0.068          | 2.387   | 0.018   | 0.043                         |
| Gender x <i>CRBP2</i>    | rs2118981  | 0.164    | 0.061          | 2.669   | 0.008   | 0.035                         |
| Gender x <i>APOA1</i>    | rs2727784  | 0.116    | 0.062          | 1.874   | 0.062   | 0.085                         |
| Gender x $\alpha$ -TTP   | rs4501570  | -0.122   | 0.063          | -1.934  | 0.054   | 0.085                         |
| Gender x <i>CETP</i>     | rs5882     | -0.094   | 0.064          | -1.459  | 0.146   | 0.160                         |

## Online Supporting Material

|                    |          |       |       |       |       |       |
|--------------------|----------|-------|-------|-------|-------|-------|
| Gender ×<br>SCARB1 | rs838892 | 0.154 | 0.063 | 2.431 | 0.016 | 0.043 |
|--------------------|----------|-------|-------|-------|-------|-------|

<sup>1</sup>*P*-values are adjusted by the false discovery rate (1, 2).

The F test for the interaction terms with  $df = 6$  and 350 gave a value of  $P < 0.0001$ , which indicates that the interaction effects are highly significant. We performed backward selection based on *P* values to obtain the final model. The results of the final model are included in **Table 2** of the manuscript.

We also used the preliminary model (screened by the LASSO method, which includes the first 15 SNP (labeled 1 – 15, **Supplemental Table 2**) as well as gender, blood group (WB versus PDC), and any interaction terms between gender and the 15 SNP. We then used AIC stepwise selection again. The summary of the resulting model is in **Supplemental Table 4**. We further performed backward selection based on *P* values, which led to the same final model as the model obtained when using the preliminary model by AIC selection (**Supplemental Table 1**).

For this final model (**Table 2**, manuscript), the residuals versus fitted values were plotted (**Supplemental Figure 2**) and we also obtained the Q-Q plot of residuals from the final model (**Supplemental Figure 3**). The model assumptions of normality, independence, and homoscedasticity were found not to be seriously violated as indicated by **Supplemental Figure 2** and **Supplemental Figure 3**.

## Online Supporting Material

**Supplemental Table 4:** Summary of the model obtained by adding interactions between gender and 15 SNPs to the model screened by LASSO.

| Predictor                | SNP        | Estimate | Standard Error | t value | P value | Adjusted P value <sup>1</sup> |
|--------------------------|------------|----------|----------------|---------|---------|-------------------------------|
| Intercept                | -          | -4.929   | 0.083          | -59.615 | 0.000   | 0.000                         |
| <i>SPTLC1</i>            | rs11790991 | -0.081   | 0.036          | -2.226  | 0.027   | 0.044                         |
| <i>BCMO1</i>             | rs12934922 | -0.045   | 0.032          | -1.430  | 0.154   | 0.173                         |
| <i>MTHFR</i>             | rs1801131  | -0.039   | 0.044          | -0.888  | 0.375   | 0.397                         |
| <i>CRBP2</i>             | rs2118981  | -0.173   | 0.043          | -4.026  | 0.000   | 0.000                         |
| <i>ABCA1</i>             | rs2230806  | 0.069    | 0.033          | 2.078   | 0.038   | 0.058                         |
| <i>APOA1</i>             | rs2727784  | -0.100   | 0.043          | -2.347  | 0.019   | 0.039                         |
| <i>BHMT</i>              | rs3733890  | 0.080    | 0.035          | 2.289   | 0.023   | 0.041                         |
| <i>CETP</i>              | rs5882     | 0.113    | 0.043          | 2.614   | 0.009   | 0.024                         |
| <i>FOLH1</i>             | rs61886492 | -0.149   | 0.084          | -1.761  | 0.079   | 0.109                         |
| <i>SCARB1</i>            | rs838892   | -0.008   | 0.044          | -0.183  | 0.855   | 0.855                         |
| Blood groups, WB vs. PDC | -          | -0.254   | 0.054          | -4.720  | 0.000   | 0.000                         |
| Gender                   | -          | -0.652   | 0.106          | -6.135  | 0.000   | 0.000                         |
| Gender x <i>MTHFR</i>    | rs1801131  | 0.186    | 0.068          | 2.748   | 0.006   | 0.023                         |
| Gender x <i>CRBP2</i>    | rs2118981  | 0.161    | 0.062          | 2.599   | 0.010   | 0.024                         |
| Gender x <i>APOA1</i>    | rs2727784  | 0.104    | 0.062          | 1.693   | 0.091   | 0.117                         |
| Gender x <i>CETP</i>     | rs5882     | -0.100   | 0.064          | -1.547  | 0.123   | 0.147                         |
| Gender x <i>SCARB1</i>   | rs838892   | 0.163    | 0.064          | 2.564   | 0.011   | 0.024                         |

<sup>1</sup>P-values are adjusted by the false discovery rate (1, 2).



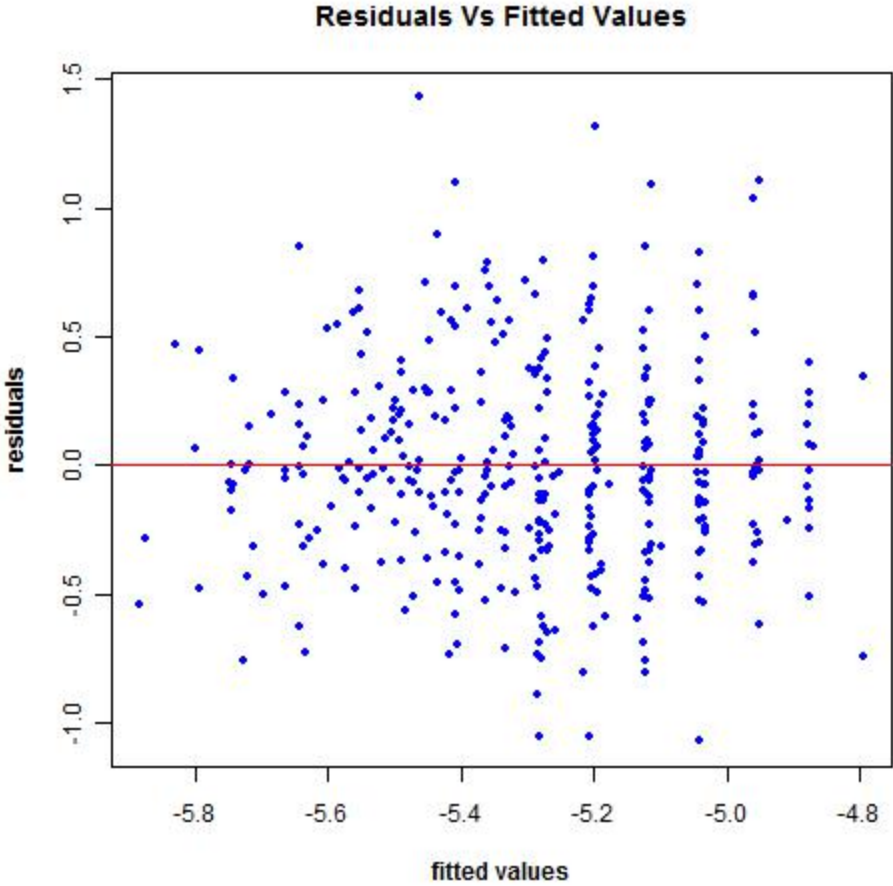

**Supplemental Figure 2:** The residual plot for the final model

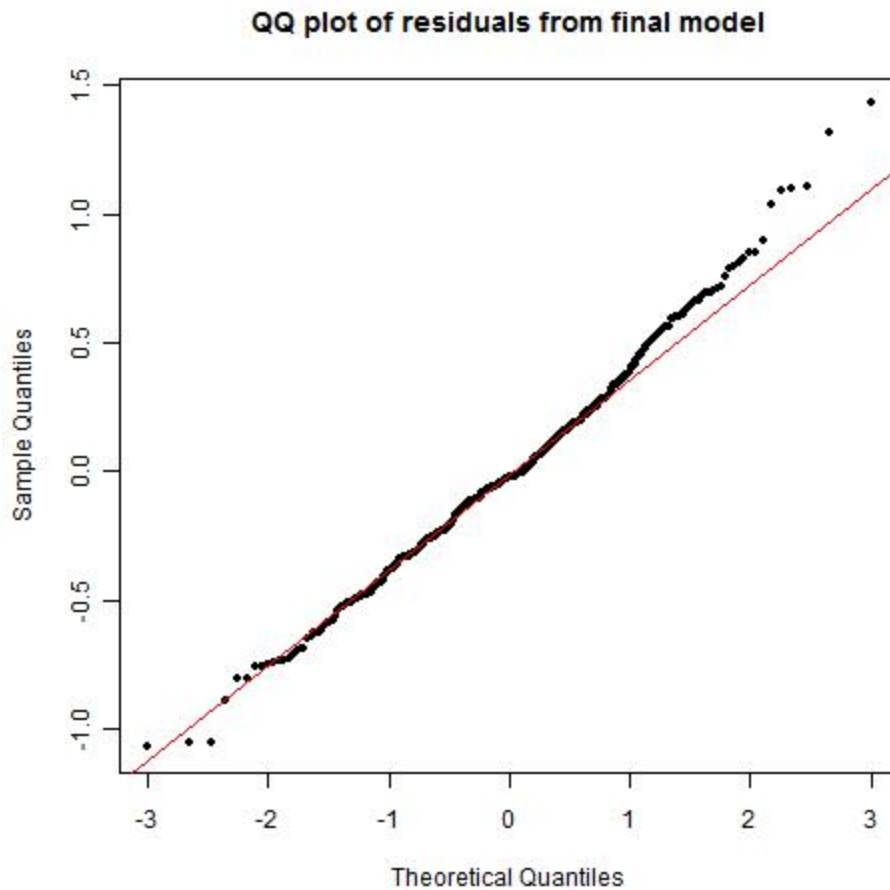

**Supplemental Figure 3:** The Q-Q plot of the residuals for the final model

### Supplemental Literature Cited

1. Benjamini Y, Hochberg Y. Controlling the false discovery rate: a practical and powerful approach to multiple testing. *J Royal Stat Soc Series B*. 1995;57:239-300.
2. Benjamini Y, Yekutieli D. The control of the false discovery rate in multiple testing under dependency. *Annals of Statistics*. 2001;29:1165-88.
3. Efron B, Hastie T, Johnstone I, Tibshirani R. Least angle regression. *Annals of Statistics*. 2004;32:407-99.

## Online Supporting Material

4. Hastie T, Tibshirani R, Friedman J. Elements of Statistical Learning. New York, NY: Springer; 2002.
